# Supplementary material for: Memory Impairment, Pro-Inflammatory Host Response and Brain Histopathologic Severity in Rats Infected with K. pneumoniae or P. aeruginosa Meningitis
Source: MDPI journal article supplement (doi:10.3390/pathogens11080933), 2022-08-18
Supplement: s1 [file s1]

Archive with 1 entries (1 files):
- pathogens-1833681-supplementary.pdf
